# Supplementary material for: Artificial Transcription Factors for Tuneable Gene Expression in Pichia pastoris
Source: PubMed Central journal article supplement (PMC8381338; doi:10.3389/fbioe.2021.676900), 2021-08-09
Supplement: Image_1.pdf [file Image_1.pdf]

## Supplementary Figures

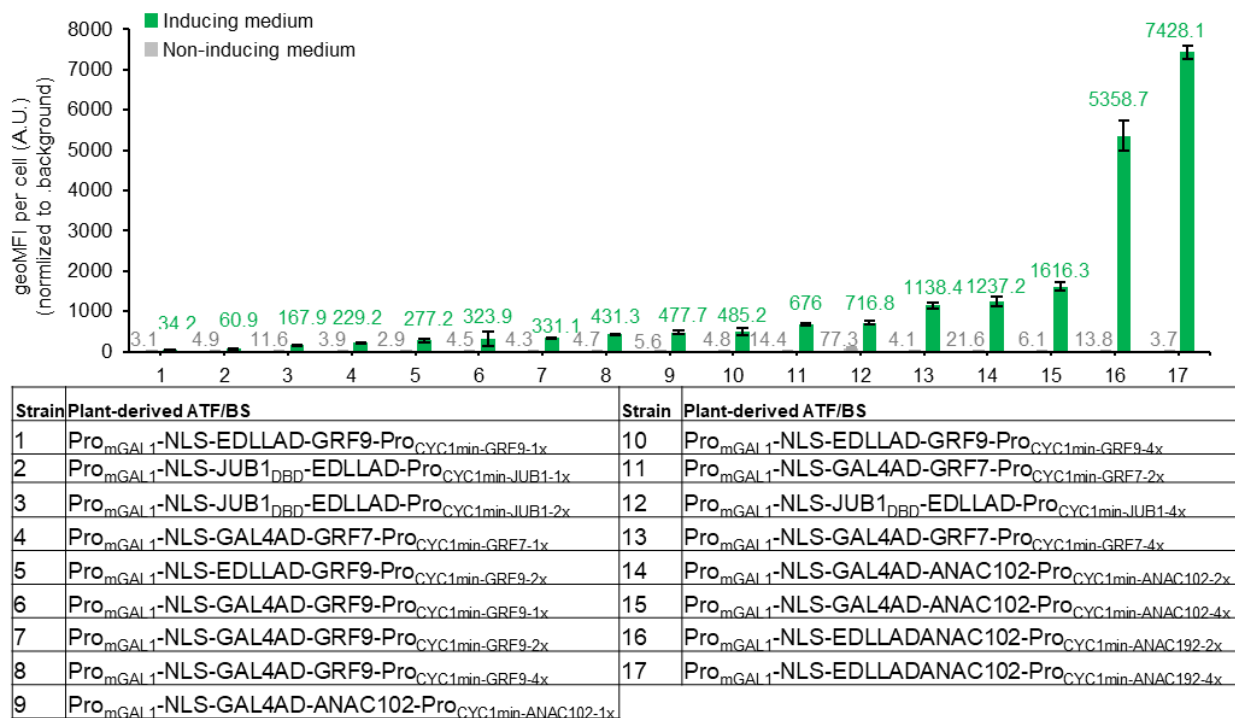

### Supplementary Figure 1.

The genome-integrated, plant-based ATFs in *S. cerevisiae*.

A total of 17 different plant-derived ATFs and promoter pair combinations, providing weak (1–7; 0–400 AU), medium (8–13; 400–1,200 AU), and strong (14–17; 1,200–8,000 AU) transcriptional outputs (green) and low basal expression (grey), were selected from the previously characterised library of plant-derived ATF/BS integrated into the *ura3-52* locus. geoMFI, geometric mean fluorescence intensity; AU, arbitrary units, determined using EGFP as a reporter. ANAC102, A NAC domain transcription factor; GRF7, Growth-Regulating Factor 7; GRF9, Growth-Regulating Factor 9; JUB1, JUNGBRUNNEN1; NLS, nuclear localization signal; Pro<sub>CYC1mini</sub>, *CYC1* minimal promoter; Pro<sub>mGAL1</sub>, modified *GAL1* promoter. '1X', '2X', and '4X' indicate the number of bindings sites implemented for the ATFs within the *CYC1* minimal promoters. Data are shown in **Data S5**.
